# Supplementary material for: Prediction of CYP-Mediated Drug Interaction Using Physiologically Based Pharmacokinetic Modeling: A Case Study of Salbutamol and Fluvoxamine
Source: MDPI journal article supplement (doi:10.3390/pharmaceutics15061586), 2023-05-24
Supplement: s1 [file s1]

# Supplementary Materials: Prediction of CYP-mediated drug interaction using physiologically based pharmacokinetic modeling: A case study of salbutamol and fluvoxamine

Lara Marques <sup>1,2,3</sup> and Nuno Vale <sup>1,3,4,\*</sup>

<sup>1</sup> OncoPharma Research Group, Center for Health Technology and Services Research (CINTESIS), Rua Doutor Plácido da Costa, 4200-450 Porto, Portugal

<sup>2</sup> Faculty of Medicine, University of Coimbra, Azinhaga de Santa Comba, Celas, 3000-548 Coimbra, Portugal

<sup>3</sup> CINTESIS@RISE, Faculty of Medicine, University of Porto, Al. Prof. Hernâni Monteiro, 4200-319 Porto, Portugal

<sup>4</sup> Department of Community Medicine, Health Information and Decision (MEDCIDS), Faculty of Medicine, University of Porto, Rua Dr. Plácido da Costa, 4200-450 Porto, Portugal

\* Correspondence: nunovale@med.up.pt; Tel.: +351-220426537

**Table S1.** List of potential salbutamol-interacting drugs, belonging to different drug classes, from corticosteroids to antidepressants.

| Drug                   | Drug Class                             |
|------------------------|----------------------------------------|
| Atenolol               | $\beta$ -blocker                       |
| Beclomethasone         | Corticosteroid                         |
| Doxepin                | Tricyclic antidepressant               |
| Fluticasone Propionate | Corticosteroid                         |
| Fluticasone            | Corticosteroid                         |
| Formoterol             | Long-acting $\beta$ -agonist           |
| Furosemide             | Diuretic                               |
| Isocarboxazid          | Monoamine oxidase inhibitor            |
| Ketotifen              | Antihistamine                          |
| Methylprednisolone     | Corticosteroid                         |
| Prednisolone           | Corticosteroid                         |
| Prednisone             | Corticosteroid                         |
| Propranolol            | $\beta$ -blocker                       |
| Rosiglitazone          | Thiazolidinedione                      |
| Salmeterol             | Long-acting $\beta$ -agonist           |
| Theophylline           | Xanthine                               |
| Fluvoxamine            | Selective serotonin reuptake inhibitor |

**Table S2.** PBPK models and respective individuals' characteristics.

| PBPK Model | Population | Gender | Age (years) | Health Status             | Height (cm) | Weight (kg) | BMI (kg/m <sup>2</sup> ) | Body Fat (%) |
|------------|------------|--------|-------------|---------------------------|-------------|-------------|--------------------------|--------------|
| 1          | American   | Male   | 30          | Healthy                   | 176.43      | 75.0        | 24.0944                  | 23.41        |
| 2          | American   | Male   | 10          | Healthy                   | 145.23      | 38.9        | 18.4432                  | 17.18        |
| 3          | American   | Male   | 65          | Healthy                   | 173.76      | 75.0        | 24.8406                  | 24.08        |
| 4          | American   | Male   | 30          | Mild Renal Impairment     | 176.43      | 75.0        | 24.0944                  | 23.41        |
| 5          | American   | Male   | 30          | Moderate Renal Impairment | 176.43      | 75.0        | 24.0944                  | 23.41        |
| 6          | American   | Male   | 30          | Severe Renal Impairment   | 176.43      | 75.0        | 24.0944                  | 23.41        |
| 7          | American   | Male   | 30          | Healthy (Overweight)      | 176.43      | 85.53       | 27.4773                  | 26.34        |
| 8          | American   | Male   | 30          | Healthy (Obese)           | 176.43      | 105.0       | 33.7322                  | 31.80        |
| 9          | American   | Female | 30          | Healthy                   | 162.20      | 65.0        | 24.71                    | 33.28        |
| 10         | American   | Female | 30          | Healthy (Pregnant)        | 162.20      | 65.0        | 24.71                    | 33.28        |

BMI, Body Mass Index

**Table S3.** Metabolic profile of the 17 potential salbutamol-interacting drugs, estimated by ADMET Predictor<sup>®</sup>.

| Drug           | CYP Enzyme | Inhibitor | Substrate | K <sub>m</sub> | V <sub>max</sub> | CL     | Sites of metabolism |
|----------------|------------|-----------|-----------|----------------|------------------|--------|---------------------|
| Atenolol       | 1A2        | No (63%)  | No (90%)  | NS             | NS               | NS     | NS                  |
|                | 2A6        | ND        | No (98%)  | NS             | NS               | NS     | NS                  |
|                | 2B6        | ND        | No (98%)  | NS             | NS               | NS     | NS                  |
|                | 2C8        | ND        | No (92%)  | NS             | NS               | NS     | NS                  |
|                | 2C9        | No (95%)  | Yes (98%) | NS             | NS               | NS     | NS                  |
|                | 2C19       | No (99%)  | Yes (39%) | 74.179         | 422.087          | 79.662 | C17, C7             |
|                | 2D6        | Yes (46%) | Yes (66%) | 0.778          | 1.291            | 13.282 | C17, C7             |
|                | 2E1        | ND        | No (98%)  | NS             | NS               | NS     | NS                  |
|                | 3A4        | No (78%)  | No (84%)  | NS             | NS               | NS     | NS                  |
| Beclomethasone | 1A2        | No (82%)  | No (97%)  | NS             | NS               | NS     | NS                  |
|                | 2A6        | ND        | No (98%)  | NS             | NS               | NS     | NS                  |
|                | 2B6        | ND        | Yes (71%) | ND             | ND               | ND     | C28, C34 e C27      |
|                | 2C8        | ND        | No (63%)  | NS             | NS               | NS     | NS                  |
|                | 2C9        | No (99%)  | No (98%)  | NS             | NS               | NS     | NS                  |
|                | 2C19       | No (95%)  | No (88%)  | 74.179         | 422.087          | 79.662 | C17, C7             |
|                | 2D6        | No (95%)  | No (95%)  | 0.778          | 1.291            | 13.282 | C17, C7             |
|                | 2E1        | ND        | No (84%)  | NS             | NS               | NS     | NS                  |
|                | 3A4        | Yes (80%) | Yes (89%) | 40.448         | 16.885           | 46.338 | C7, C33 e C27       |

|                        |      |           |           |          |          |        |                              |
|------------------------|------|-----------|-----------|----------|----------|--------|------------------------------|
| Doxepin                | 1A2  | No (97%)  | Yes (91%) | 23.920   | 10.658   | 23.171 | C20 e C21                    |
|                        | 2A6  | ND        | No (70%)  | NS       | NS       | NS     | NS                           |
|                        | 2B6  | ND        | Yes (89%) | ND       | ND       | ND     | C20, C21 e C11               |
|                        | 2C8  | ND        | Yes (91%) | ND       | ND       | ND     | C20, C21                     |
|                        | 2C9  | No (90%)  | Yes (66%) | 5.823    | 0.149    | 1.867  | C20, C21                     |
|                        | 2C19 | Yes (31%) | Yes (82%) | 69.614   | 15.082   | 3.033  | C20, C21                     |
|                        | 2D6  | Yes (51%) | Yes (87%) | 3.417    | 7.545    | 17.667 | C20, C21, C13 e C11          |
|                        | 2E1  | ND        | No (69%)  | NS       | NS       | NS     | NS                           |
|                        | 3A4  | No (90%)  | Yes (74%) | 74.034   | 4.391    | 6.584  | C20, C21                     |
| Fluticasone Propionate | 1A2  | No (76%)  | No (97%)  | NS       | NS       | NS     | NS                           |
|                        | 2A6  | ND        | No (98%)  | NS       | NS       | NS     | NS                           |
|                        | 2B6  | ND        | Yes (44%) | ND       | ND       | ND     | S28                          |
|                        | 2C8  | ND        | No (86%)  | NS       | NS       | NS     | NS                           |
|                        | 2C9  | No (99%)  | No (88%)  | NS       | NS       | NS     | NS                           |
|                        | 2C19 | No (89%)  | No (88%)  | NS       | NS       | NS     | NS                           |
|                        | 2D6  | No (95%)  | No (85%)  | NS       | NS       | NS     | NS                           |
|                        | 2E1  | ND        | No (76%)  | NS       | NS       | NS     | NS                           |
|                        | 3A4  | Yes (80%) | Yes (98%) | 19.997   | 6.993    | 39.033 | S28, C7, C33 e C29           |
| Fluticasone            | 1A2  | No (90%)  | No (97%)  | NS       | NS       | NS     | NS                           |
|                        | 2A6  | ND        | No (98%)  | NS       | NS       | NS     | NS                           |
|                        | 2B6  | ND        | Yes (61%) | ND       | ND       | ND     | S28                          |
|                        | 2C8  | ND        | Yes (58%) | ND       | ND       | ND     | C29, S28, C16, C24, C19 e C7 |
|                        | 2C9  | No (99%)  | No (96%)  | NS       | NS       | NS     | NS                           |
|                        | 2C19 | No (94%)  | No (88%)  | NS       | NS       | NS     | NS                           |
|                        | 2D6  | No (95%)  | No (95%)  | NS       | NS       | NS     | NS                           |
|                        | 2E1  | ND        | No (71%)  | NS       | NS       | NS     | NS                           |
|                        | 3A4  | Yes (38%) | Yes (98%) | 40.068   | 1.515    | 4.197  | S28, C7, C29                 |
| Formoterol             | 1A2  | Yes (58%) | No (97%)  | NS       | NS       | NS     | NS                           |
|                        | 2A6  | ND        | No (94%)  | NS       | NS       | NS     | NS                           |
|                        | 2B6  | ND        | No (98%)  | NS       | NS       | NS     | NS                           |
|                        | 2C8  | ND        | No (92%)  | NS       | NS       | NS     | NS                           |
|                        | 2C9  | No (95%)  | No (98%)  | NS       | NS       | NS     | NS                           |
|                        | 2C19 | No (96%)  | No (88%)  | NS       | NS       | NS     | NS                           |
|                        | 2D6  | Yes (70%) | Yes (87%) | 5.614    | 8.237    | 11.739 | C19, C23                     |
|                        | 2E1  | ND        | No (98%)  | NS       | NS       | NS     | NS                           |
|                        | 3A4  | No (46%)  | No (48%)  | NS       | NS       | NS     | NS                           |
| Furosemide             | 1A2  | No (86%)  | No (97%)  | NS       | NS       | NS     | NS                           |
|                        | 2A6  | ND        | No (70%)  | NS       | NS       | NS     | NS                           |
|                        | 2B6  | ND        | No (98%)  | NS       | NS       | NS     | NS                           |
|                        | 2C8  | ND        | No (77%)  | NS       | NS       | NS     | NS                           |
|                        | 2C9  | Yes (49%) | Yes (45%) | 5.540    | 3.661    | 48.237 | C2 e C6                      |
|                        | 2C19 | Yes (99%) | Yes (82%) | 1813.378 | 3637.938 | 38.086 | C6, C2 e C1                  |
|                        | 2D6  | No (55%)  | No (68%)  | NS       | NS       | NS     | NS                           |
|                        | 2E1  | ND        | Yes (82%) | ND       | ND       | ND     | C2                           |
|                        | 3A4  | No (80%)  | No (38%)  | NS       | NS       | NS     | NS                           |
| Isocarboxazid          | 1A2  | Yes (95%) | Yes (74%) | 524.501  | 15.319   | 1.519  | C7, C17 e C3                 |
|                        | 2A6  | ND        | Yes (82%) | ND       | ND       | ND     | C7, C17, N13 e C3            |
|                        | 2B6  | ND        | No (89%)  | NS       | NS       | NS     | NS                           |
|                        | 2C8  | ND        | Yes (58%) | ND       | ND       | ND     | C7, C17 e C3                 |
|                        | 2C9  | Yes (41%) | No (88%)  | NS       | NS       | NS     | NS                           |
|                        | 2C19 | No (78%)  | Yes (61%) | 57.052   | 132.576  | 32.533 | C17 e C7                     |
|                        | 2D6  | No (95%)  | No (68%)  | NS       | NS       | NS     | NS                           |
|                        | 2E1  | ND        | Yes (40%) | ND       | ND       | ND     | C7, C3 e N13                 |
|                        | 3A4  | Yes (51%) | No (58%)  | NS       | NS       | NS     | NS                           |

|                    |      |           |           |         |        |        |                        |
|--------------------|------|-----------|-----------|---------|--------|--------|------------------------|
| Ketotifen          | 1A2  | No (90%)  | Yes (91%) | 139.473 | 9.355  | 3.488  | C22 e N19              |
|                    | 2A6  | ND        | Yes (ND)  | ND      | ND     | ND     | C22 e C12              |
|                    | 2B6  | ND        | No (ND)   | NS      | NS     | NS     | NS                     |
|                    | 2C8  | ND        | No (77%)  | NS      | NS     | NS     | NS                     |
|                    | 2C9  | No (ND)   | Yes (ND)  | 21.787  | 0.107  | 0.359  | C22                    |
|                    | 2C19 | Yes (ND)  | Yes (ND)  | 50.763  | 5.845  | 1.612  | C22                    |
|                    | 2D6  | Yes (55%) | Yes (ND)  | 21.857  | 27.720 | 10.146 | C22, C12, C7, C3 e N19 |
|                    | 2E1  | ND        | No (76%)  | NS      | NS     | NS     | NS                     |
|                    | 3A4  | No (90%)  | Yes (92%) | 53.902  | 4.131  | 8.507  | C22, N19 e C12         |
| Methylprednisolone | 1A2  | No (97%)  | No (97%)  | NS      | NS     | NS     | NS                     |
|                    | 2A6  | ND        | No (98)   | NS      | NS     | NS     | NS                     |
|                    | 2B6  | ND        | Yes (47%) | ND      | ND     | ND     | C25                    |
|                    | 2C8  | ND        | No (66%)  | NS      | NS     | NS     | NS                     |
|                    | 2C9  | No (99%)  | No (98%)  | NS      | NS     | NS     | NS                     |
|                    | 2C19 | No (95%)  | No (99%)  | NS      | NS     | NS     | NS                     |
|                    | 2D6  | No (95%)  | No (95%)  | NS      | NS     | NS     | NS                     |
|                    | 2E1  | ND        | No (78%)  | NS      | NS     | NS     | NS                     |
|                    | 3A4  | Yes (46%) | Yes (98%) | 92.176  | 37.806 | 45.527 | C7, C25 e C13          |
| Prednisolone       | 1A2  | No (97%)  | No (97%)  | NS      | NS     | NS     | NS                     |
|                    | 2A6  | ND        | No (98%)  | NS      | NS     | NS     | NS                     |
|                    | 2B6  | ND        | Yes (46%) | ND      | ND     | ND     | C24 e C12              |
|                    | 2C8  | ND        | No (77%)  | NS      | NS     | NS     | NS                     |
|                    | 2C9  | No (99%)  | No (98%)  | NS      | NS     | NS     | NS                     |
|                    | 2C19 | No (97%)  | No (95%)  | NS      | NS     | NS     | NS                     |
|                    | 2D6  | No (95%)  | No (95%)  | NS      | NS     | NS     | NS                     |
|                    | 2E1  | ND        | No (80%)  | NS      | NS     | NS     | NS                     |
|                    | 3A4  | Yes (38%) | Yes (92%) | 83.372  | 24.021 | 31.981 | C7, C24 e C12          |
| Prednisone         | 1A2  | No (97%)  | No (90%)  | NS      | NS     | NS     | NS                     |
|                    | 2A6  | ND        | No (98%)  | NS      | NS     | NS     | NS                     |
|                    | 2B6  | ND        | Yes (49%) | ND      | ND     | ND     | C23                    |
|                    | 2C8  | ND        | No (80%)  | NS      | NS     | NS     | NS                     |
|                    | 2C9  | No (99%)  | No (98%)  | NS      | NS     | NS     | NS                     |
|                    | 2C19 | No (98%)  | No (95%)  | NS      | NS     | NS     | NS                     |
|                    | 2D6  | No (95%)  | No (95%)  | NS      | NS     | NS     | NS                     |
|                    | 2E1  | ND        | No (84%)  | NS      | NS     | NS     | NS                     |
|                    | 3A4  | Yes (46%) | Yes (98%) | 74.801  | 11.076 | 16.436 | C7, C23                |
| Propanolol         | 1A2  | No (61%)  | No (97%)  | NS      | NS     | NS     | NS                     |
|                    | 2A6  | ND        | No (98%)  | NS      | NS     | NS     | NS                     |
|                    | 2B6  | ND        | No (73%)  | NS      | NS     | NS     | NS                     |
|                    | 2C8  | ND        | No (92%)  | NS      | NS     | NS     | NS                     |
|                    | 2C9  | No (92%)  | No (98%)  | NS      | NS     | NS     | NS                     |
|                    | 2C19 | No (65%)  | No (99%)  | NS      | NS     | NS     | NS                     |
|                    | 2D6  | No (55%)  | Yes (87%) | 3.901   | 1.458  | 2.990  | C17                    |
|                    | 2E1  | ND        | No (98%)  | NS      | NS     | NS     | NS                     |
|                    | 3A4  | No (90%)  | No (58%)  | NS      | NS     | NS     | NS                     |
| Rosiglitazone      | 1A2  | No (90%)  | No (91%)  | NS      | NS     | NS     | NS                     |
|                    | 2A6  | ND        | No (63%)  | NS      | NS     | NS     | NS                     |
|                    | 2B6  | ND        | No (78%)  | NS      | NS     | NS     | NS                     |
|                    | 2C8  | ND        | Yes (83%) | ND      | ND     | ND     | C23 e C4               |
|                    | 2C9  | Yes (63%) | Yes (66%) | 117.900 | 8.272  | 5.122  | S19, C23, C4 e C5      |
|                    | 2C19 | Yes (23%) | Yes (82%) | 15.478  | 0.964  | 0.872  | C23, S19 e C9          |
|                    | 2D6  | No (95%)  | Yes (56%) | 9.274   | 11.191 | 9.654  | S19, C4 e C23          |
|                    | 2E1  | ND        | Yes (70%) | ND      | ND     | ND     | S19, C4 e C23          |
|                    | 3A4  | No (67%)  | Yes (82%) | 35.382  | 4.836  | 15.171 | C23 e S19              |
| Salmeterol         | 1A2  | Yes (72%) | No (97%)  | NS      | NS     | NS     | NS                     |

|              |      |           |           |         |        |        |                         |
|--------------|------|-----------|-----------|---------|--------|--------|-------------------------|
|              | 2A6  | ND        | No (94%)  | NS      | NS     | NS     | NS                      |
|              | 2B6  | ND        | No (83%)  | NS      | NS     | NS     | NS                      |
|              | 2C8  | ND        | No (99%)  | NS      | NS     | NS     | NS                      |
|              | 2C9  | No (90%)  | No (90%)  | NS      | NS     | NS     | NS                      |
|              | 2C19 | No (91%)  | No (72%)  | NS      | NS     | NS     | NS                      |
|              | 2D6  | Yes (70%) | Yes (72%) | 3.054   | 37.871 | 99.216 | C7, C20, C11, C23 e C27 |
|              | 2E1  | ND        | No (82%)  | NS      | NS     | NS     | NS                      |
|              | 3A4  | Yes (51%) | No (51%)  | NS      | NS     | NS     | NS                      |
| Theophylline | 1A2  | No (86%)  | Yes (91%) | 173.268 | 1.901  | 0.570  | C12 e C7                |
|              | 2A6  | ND        | Yes (82%) | ND      | ND     | ND     | C12                     |
|              | 2B6  | ND        | No (75%)  | NS      | NS     | NS     | NS                      |
|              | 2C8  | ND        | No (99%)  | NS      | NS     | NS     | NS                      |
|              | 2C9  | No (99%)  | No (72%)  | NS      | NS     | NS     | NS                      |
|              | 2C19 | No (98%)  | No (95%)  | NS      | NS     | NS     | NS                      |
|              | 2D6  | No (95%)  | No (95%)  | 3.054   | 37.871 | 99.216 | C7, C20, C11, C23 e C27 |
|              | 2E1  | ND        | Yes (49%) | ND      | ND     | ND     | C7, C10 e C12           |
|              | 3A4  | No (81%)  | No (38%)  | NS      | NS     | NS     | NS                      |

ND, not defined; NS, no substrate
